# Supplementary material
Source: publisher figshare collection journal article supplement (https://geolsoc.figshare.com/ndownloader/files/30640056)
Supplement: Supplementary file 1 [file 30640056]

Sample number	Total organic carbon (wt %)	TOC/TN	delta13C
F1
1226-162	0.153489441	10.75808715	-23.41594371
1226-167	0.205077067	11.50031639	-24.0846626					--	--
F2a (fine)
1226-44	0.13744767	9.152069212	-21.75255804
1226-75	0.294062525	11.3010228	-23.41384082
1226-142	0.230640918	10.2501572	-22.19837064
1226-172	0.106361553	13.10580781	-25.0845866
F2a (coarse)
1215-179	0.109549627	9.866075268	-22.79033406
1215-210	0.145232826	10.10749849	-23.17516285
1219-172	0.120270193	9.57241513	-23.51583097
1226-50	0.039212145	7.136818262	-24.38537581
1226-180	0.076412752	12.0650479	-25.13085018
1230-297	0.046615437	7.804054751	-24.18665275
1230-312	0.046602175	7.623656465	-18.97674378
1230-332	0.073471069	12.24379076	-23.71455403
F2b (fine)
1219-16	0.079786666	7.527972782	-21.52229163
1219-46	0.058837846	7.165601297	-22.90599298
1219-312	0.03977368	6.695758201	-23.60835811
1226-90	0.049394961	9.252976374	-27.40827961
1226-151	0.05012222
1230-48	0.057034452	8.360611024	-23.9132771
F2b (coarse)
1219-58	0.024902303
1219-61	0.049200553	7.253038529	-23.04793803
1226-34	0.046456762	8.758753452	-25.0751236
1226-101	0.047873922
1226-117	0.045034613
1226-134	0.027299996
1226-138	0.028494271
1226-159	0.044988342
1226-171	0.045633368									--	--
1226-174	0.047961734									--	--
1226-18	0.043404978									--	--
1230-56	0.04607936	8.133599427	-26.01826958							--
1230-63	0.039231893	6.15615225	-25.73017371							--
1230-138	0.032067858									--
1230-158	0.032505117									--
